# Supplementary material for: Antigenic Variation in Streptococcus pneumoniae PspC Promotes Immune Escape in the Presence of Variant-Specific Immunity
Source: PubMed Central journal article supplement (PMC5850329; doi:10.1128/mbio.00264-18), 2018-03-13
Supplement: mbo002183775s1.pdf [file mbo002183775s1.pdf]

**Supplementary Information.** Sequences of full length PspC variants and truncated protein fragments (in grey).

**PspC Var-I**

1                    10                    20                    30                    40                    50  
|                    |                    |                    |                    |                    |  
ATGTTTGCATCAAAAAGCGAAAAGTACATTATTCAATTCGTAAATT  
TAGTGTTGGAGTAGCTAGTGTAGTAGTTGCTAGCTTGTTCTTAGGAGGAG  
TAGTCCATGCAGAAGGGGTTAGAAGTGGGGATACCCCAAGGTTACATCT  
AGTGGGCAAGATATATCGAAGAAGTATGCTGATGAAGTCAAGTCGCATCT  
AGAAAAAATATTGAGTGAGATCCAATTAGATAAAAAGAAAACATACCCAAA  
ATCTCGCCTTCAACA AAAAGTTGAGCAGAATTCAAACGGAGTATTTCTAT  
TTAAAAAAGAAGTTGAAAAGCTGAGTTGACGTCAAAAACAAAAGAAGAGTT  
AACGTCAAAAACAGAAGAGTTGACGTCAAAAACAAAAAAGAGTTAGACG  
CAGCTTTTGAGCAGTTTAAAAAAGATACATTATCAACAGAACCAGAAAAA  
AAGGTTGCAGAAGCTCAGAAGAAGGTAGCAGAAGCTAAGAAAAAAGCCGA  
GGATCAAAAAGAAGAAGATCGTCGTAAC TACCCAACCAATACTTACAAAA  
CGCTTGAAC TTGAAATTGCTGAGTTTCGATGTGAAAGTTAAAGAAGCGGAG  
CTTGAAC TATTTAAAAGAGAAAAGCTAAGGAATCTCGAGACGAGGAAAAAAT  
TAAGCAAGCAGAAGCGGAAGTTGAGAGTAAACAAGCTGAGGCTACAAGGT  
TAGAAAACATCAAGACAGATCGTAAAAAAGCAGAAGAAGAAGCTAAACGA  
AAAGCAGATGCTAAGTTGAAGGAAGCTAATGTAGCGACTTCAGATCAAGG  
TAAACCAAAGGGGCGGGCAAAACGAGGAGTTCCTGGAGAGCTAGCAACAC  
CTGATAAAAAGAAAATGATGCGAAGTCTTCAGATTCTAGCGTAGGTGAA  
GAAACTCTTCCAAGCTCATCCCTGAAATCAGGAAAAAAGGTAGCAGAAGC  
TGAGAAGAAGGTTGAAGAAGCTGAGAAAAAAGCCAAGGATCAAAAAGAAG  
AAGATCGCCGTAAC TACCCAACCAATACTTACAAAACGCTTGAAC TTGAA  
ATTGCTGAGTCCGATGTGAAAGTTAAAGAAGCGGAGCTTGAAC TAGTAAA  
AGAGGAAGCTAAGGAACCTCGAGACGAGGAAAAAATTAAGCAAGCAAAAAG  
CGGAAGTTGAGAGTAAACAAGCTGAGGCTACAAGGTTAGAAAAAATCAAG  
ACAGATCGTAAAAAAGCAGAAGAAGAAGCTAAACGAAAAGCAGCAGAAGA  
AGATAAAGTTAAAGAAAAACCAGCTGAACAACCACAACCAGCGCCGGCTC  
CTCAACCAGAAAAACCAGCTCCAAAACCAGAAAAACCAGCTCCAGCTCCA  
AAACCAGAGAATCCAGCTGAACAACCAAAAAGCAGAAAAACCAGCTGATCA  
ACAAGCTGAAGAAGACTATGCTCGTAGATCAGAAGAAGAATATAATCGCT  
TGACTCAACAGCAACCGCCAAAAACTGAAAAACCAGCACAACCATCTACT  
CCAAAAACAGGCTGGAAACAAGAAAACGGTATGTGGTACTTCTACAATAC  
TGATGGTTCAATGGCGACAGGATGGCTCCAAAACAATGGCTCATGGTACT  
ACCTCAACAGCAATGGCGCTATGGCGACAGGATGGCTCCAAAACAATGGT  
TCATGGTACTATCTAAACGCTAATGGTTCAATGGCAACAGGATGGCTCCA  
AAACAATGGTTCATGGTACTACCTCAACGCTAATGGTTCATGGCGACAG  
GATGGCTCCAATACAATGGTTCATGGTACTACCTCAACGCTAATGGTGAT  
ATGGCGACAGGATGGCTCCAAAACAATGGCTCATGGTACTACCTAAACGC  
TAATGGTGATATGGCGACAGGATGGCTCCAAAACAACGGTTCATGGTACT  
ACCTAAACAGCAATGGTGCTATGGTAACAGGATGGCTCCAAAACAATGGC  
TCATGGTATTACCTCAACGCTAATGGTGATATGGCGACAGGTTGGGTGAA  
AGATGGAGACACCTGGTACTATCTTGAAGCATCAGGTGCTATGAAAGCAA  
GCCAATGGTTCAAAGTATCAGATAAATGGTACTATGTCAATGGCTCAGGT  
GCCCTTGACGTCAACACAACCTGTAGATGGCTATGGAGTCAATGCCAATGG  
TGAATGGGTAAAC

**PspC Var-II**

1                    10                    20                    30                    40                    50  
|                    |                    |                    |                    |                    |  
ATGTTTGCATCAAAAAGCGAAAAGTACATTATTCAATTCGTAAATT  
TAGTATTGGAGTAGCTAGTGTAGTAGTTGCCAGCTTGTTCTTAGGAGGAG  
TAGTCCATGCAGAAGGGGTTAGGAGTAAGAATAACCTCACGGTTACATCT

AGTGGGCAAGATATATCGAAGAAGTATGCTGATGAAGTCGAGTCGCATCT  
ACAAAGTATATTGAAGGATGTCAATAAAAAATTTGAAAAAGTTCAACATA  
CCCAAATGTGCGACTTCAACAAAAAGTTGAGCAGAATTA AACCGAAGTAT  
TTGTATGGATTA AAAAGAGAAGTCGGAAGCTGAGTTGACGTTAAAAACAAA  
AGAAACAAAAGAAGAGTTAACCGCAGCTTTTGAGCAGTTTAAAAAGATA  
CATTGAAATCAGGAAAAAGGTAGCAGAAGCTGAGAAAAAGCCAAAGCT  
CAAAAAGAAGAAGATCGCCGTA ACTACCCAACCAACTTACAAAACAAT  
CGAACTGGAAATTGCGGAAGCAGAAGTAGGGGTCGCCAAGGCAGAGCTTG  
AGCTTGAGTTTGCACAAGCTCAAGTTCAAATACCTCAAGATACTGAGAAA  
ATTAATGCTGCTAAATCTAAAGTAGAAGCTGCTAAAAGTAATGTTAAAA  
ACTAGAAAAAATTAATCAGATATTGAAAAACGTATTTGTATAAATTAG  
ATAACTCAACCAAGAAACGCCAAAACCTAGAGTGCGAAGAAATTCTCCG  
GAAATAAAAGCTAAGGGCAGAGTCAAAAATTATGAAGAGGCTAATATTGA  
ACTTTCTAAATATATGACTGATTTGTATAAATTAGATAACTCAACCAAAG  
AAACGCCAAAATCTAGAGTGCGAAGAAATTCTCCGCAAGTAGGCGATTG  
AGAGA ACTTAAGGAAACGATAGACAAAAGCGAAAGAACTCTGTCTACCTA  
TATGGTAACTCGTTTAAACGAAGCTGGATCCATCTGTTTTTTGGTTTGCAG  
ATCTTCTTATGGATGCTAAGAAGGTTGTGGAAGAATACAAGACAAAATTA  
GAGGATGCTTCAGATAAAAAATCGGTAGAAGACTTGCGAAAGGAAGCAGA  
AGGAAAAATAGAGTCTCTTATCGTGACTCACAAAATAGAGAAAAAGAAA  
ACCAACCAGCACCCCAACCAGGAGGACAAGCAGGTGGTTCAATGGTTGTA  
CCACCGGTGACGCAACACCTCCATCAACTTCCCAAAGTCCAGGACAAAA  
GGCGACCGAAGCTGAAAAGAAAAAGTTACAAGACTTGATTTCGTCAATTCC  
AAGAAGCCTTGAACAAACTAGACGATGAAACAAAGACTGTTCCAGATGGG  
GCTAAACTCACAGGAGAAGCTGGAAAAGCCTATAATGAGACTAGA ACTTA  
TGCGAAAGAAGTTGTTGACAAAAGCAAGAAGCTTCTATCACAGACAGCAG  
TGACAATGGATGAATTGGCAATGCAATTAACCAAATTGAACGATGCCATG  
TCTAAATTGAAAGAAGCTAAAAGCGAAATTGGTACCAGAGGTTAAACCACA  
GCCGGA AAAACCCAGAGGCCAAAACCAACCAGAGGGTGAGAAAACCAAGCG  
TACCAGATATTAATCAGGAGAAAGAAAAAGCTAAACTTGCTATAGCAACA  
TACATGAGCAAGATTTTAGATGATATAAAGAAACATCATCTGAAGAAAGA  
AAAACATCATCAGATTGTTGCTCTTATTAAGGACCTTGATAAACTTAAAA  
AGCAAGCACTTTCTGAAATTGATAATGTAAATACCAAAGTAGAAATTGAG  
AATACAGTCCACAAGGTATTTGCAGACATGGATACGGTTGTTACTAAATT  
CCAAAAAGGCTTAATTCAGAACACACCCGAGGTTCCAGAAGCACCAAAGA  
GCCCAGAGGTACCAAAGGTTCCAGATACACCAAAGGCTCCAGACACACCG  
CAAGTTCCGGAAGCACCAAAGAGCCCAGAGGTACCAAAGGTTCCAGATAC  
ACCAAAGGCTCCAGACACACCCGCAAGTTCCGGAAGCACCAAAGAGCCCAG  
AGGTACCAAAGGTTCCAGATACACCAAAGGCTCCGGACACACCCGCAAGTT  
CCAGAAGCACCAAAGAGCCCAGAGGTACCAAAGGTTCCAGATACACCAA  
GGCTCCGGACACACCCGAGGTTCCAGAAGCACCAAAGNACATGGATACGG  
TTGTTACTAAATTCCAAAAAGGCTTAATTCAGAACACACCCGAGGTTCCA  
GAAGCACCAAAGAGCCCAGAGGTACCAAAGGTTTCAGATACACCAAAGGC  
TCCGGACACACCCGAGGTTCCAGAAGCACCAAAGAGCCCAGAGGTACCAA  
AGGTTCCAGAAGCACCAAAGGCTCCAGACACACCCGCAAGTTCCGGAAGCA  
CCAAAGAGCCCAGAGGTACCAAAGGTTCCAGATACACCAAAGGCTCCAGA  
CACACCGCAAGTTCCGGAAGCACCAAAGAGCCCAGAGGTACCAAAGGTTCC  
CAGATACACCAAAGGCTCCGGACACACCCGAGGTTCCAGAAGCACCAAAG  
GCTCCAGACACACCCGCAAATTCCGGAAGCACAGCTCCAGAAACTCCGGC  
TCCAGCTCCAGAAGCTCCAAAAACAGGCTGGAAACAAGAAAACGGTATGT  
GGTACTTCTACAATACTGATGGTTCAATGGCAACAGGCTGGCTAGAATAC  
AATGGCTCATGGTACTATCTCAACGCTAATGGTGCTATGGCAACAGGTTG  
GCTAGAATACAATGGTTCATGGTACTACCTCAATACTAATGGTGCTATGG  
AGACAGGTTGGCTAGAATACAATGGTTCATGGTACTACCTCAATACTAAT  
GGTGCTATGGAGACAGGTTGGCTAGAATACAATGGTTCATGGTACTACCT  
NNNNNNNNNNNNNNNNNNNNNNNNNNNNNNNNNNNNNNNNNNNNNNNNNN  
NNNNNNNNNNNNNNNNNNNNNNNNNNNNNNNNNNNNNNNNNNNNNNNNNN

NNNNNNNNNNNNNNNNNNNNNNNNNNNNNNNNNNNNNNNNNNNNNNNNNNNNNNNNNNNNNN  
NNNNNNNNNNNNNNNNNNNNNNNNNNNNNNNNNNNNNNNNNNNNNNNNNNNNNNNNNNNNNN  
AATGGTTCATGGTACTACCTCAATAC

**PspC Var-III**

1 10 20 30 40 50  
| | | | | |  
ATGTTTAAATCAAATTATGAAAGAAAAATGTGCTATTCTATTTCGAAAATT  
TAGTATAGGAGTAGCTAGTGTAGCTGTTGCCAGTCTTGTTATGGGAAGTG  
TGGTTCATGCGACAGAGAACGAGGGAACTACCCAAGCACCCACTTCTTCT  
AATAGGGGAAATGAAAGTCAGGCAGAACAACGTAGAGAAGCTCGATTTAGA  
ACGAGATAAGGTAAAGAAAGAGGTGAGGGAATATAAAGAAAAAAAAGTGA  
AAGAGCTCTATTCAAATCAACTAAAAGTCGACATAAGAAGACTGTAGAT  
ATAGTTAAACAAGTTGCAAAACATTAATAACGAGTATTTGAATAAAATAAT  
TCAATCAACCTCAACATACGAAGAAGTACAGAACTGATGATGGAGAGTC  
AATCAGAAGTAGATAAAGCTGTGTCTGAATTTGAAAAGGACTTATCTTCT  
TCGTCAAGTTCAGGCTCTTCCACGGAACCGGAAGCTTCAGATACAGCGAA  
GCCAAACAAGCCGACAGAAGTAAAGGTAAGGTAAGGTAAGGTAAGGTAAGG  
AGGTTGAAGAAGCTGAGAAAAAGCCAAGGATCAAAAAGAAGAAGATTAC  
CGTAACTACCCAACCTTACTTACAAAACGCTTGAAGTGAAGTGAAGTGA  
GTTTCGATGTGAAAGTTAAAGAAGCGGAGCTTGAAGTATTAAGTGAAG  
CTAAGGAATCTCGAGACGAGAAAAAATTAAGCAAGCAGAAGCGGAAGTT  
GAGAGTAAACAAGCTGAGGCTACAAGGTTAAAAAAAATCAAGACAGATCG  
TAAAAAAGCAGAAGAAGAAGCTAAGTTGAAGGAAGCTGTTGAAAAGAATG  
CAGCGACTTCAGAGCAAGGTAACCAAGAGGCGGGTAAAACGAGGAGCT  
CTTGAGAGCAAGCAACACCTGATAAAAAAGATTATTTGAAAAGACTT  
CCGTCCAGCTTTCAATAAAAAACCAGCAGATGGTAGCCATTCAAGAATCCT  
TGAACAACTAGATGATGAAACAAAACTGTTCCAGATGGGGCTAAACTC  
ACAGGAGAAGCTGAAAATGCCTATAATGAGGTGAGAGATTATGCAATAAA  
AGTTGTTTCTGAAAACAAGAACTTCTATCACAGACAGCAGTGACAATGG  
ATGAACTGGCAATGCAATTAACCAATTGAACGATGCCATGTCTAAATTG  
AAAGAAGCTAAAGCGAAATTTGGTACCAGAGGTTAAACCGCAGCCGAAAA  
TCCAGAGCATCAAAAACCAACAAGTCCAGCTCCGGATACCAAACCAATCC  
CTCAACCAGAGGGTAAGAAACCAAGCGTACCAGATATTAATCAGGAAAA  
GAAAAGCTAAGCTTGCTGTAGCAACCTACATGAGCAAGATTTTAGATGA  
TATACAAAACATCATCTGCAGAAAGAAAAACATCGTCAGATTGTTGCTC  
TTATTAAGGAGCTTGATGAGTTTAAAAAGCAAGCTCTTCTGAAATTGAT  
AATGTAAATACCAAAGTAGAAATTGAAAATACAGTCCACAAGATATTTGC  
AGACATGGATGCAGTTGTGACTAAATTCAAAAAGGCTTAACTCAGGACA  
CACAAAAGAACCAGATAACAAAAGCCATCTGCTCCAAAACCAGGTATG  
CAACCAAGTCTCAACCAGAAGGCAAGAAACATAATAAAAACACCCCAA  
AGTTAGATTTTTTCTGTCTAACTTTTTGGGGTGTAGTTTCATTTTGAGCTTT  
CCCGTTTTTCTGAGTTG

**PspC Var-IV**

1 10 20 30 40 50  
| | | | | |  
ATGTTTGCATCAAAAAGCGAAAAGAAAAGTACATTATTCAATTCGTAAATT  
TAGTATTGGAGTAGCTAGTGTAGCTGTTGCCAGTCTTGTTATGGGAAGTG  
TGGTTCATGCGACAGAGAACGAGGGAAAGTACCCAAGCAGCCACTTTTTCT  
AATATGGCAAATAAAAGTCAGACAGAACAAGGAGAAATCAATATAGAACG  
AGATAAGGCAAAGACAGCGGTGAGTGAATATAAAGAAAAAAAAGTGAGTG  
AGATCTATACAAAATTAGAGAGAGATAGACATAAAGATACTGTAGATCTA  
GTTAACAAGTTGCAAGAGATTAAGAACGAGTATTTGAATAAAATAGTTGA  
ATCAACCTCAAAAATCGAAATACAGGGACTTATTACAACAAGTCGATCAA  
AACTAGATGAAGCTGTGTCTAAATATAAAAAGGCCCATCTTCTTCGTCA  
AGTTCAGGCTCCTCCACTAAACCAGAACTCCGCAGCCGGAACATCAAA

ACCAGAGGTTAAACCAGAGCCGGAAACACCAAAACCAGAGGTTAAACCAG  
AGCCGGAAACACCAAAACCAGAGGTTAAACCAGAGCCGGAAACACCAAAA  
CCAGAGGTTAAACCAGAGCCGGAAACACCAAAACCAGAGGTTAAACCAGA  
GCCGGAAACACCAAAACCAGAGGTTAAACCAGAGCCGGAAACACCAAAAC  
CAGAGGTTAAACCAGAGCCGGAAACACCAAAACCAGAGGTTAAACCAGAG  
CCGGAAACACCAAAACCAGAGGTTAAACCAGAGCCGGAAACACCAAAACC  
AGAGGTTAAACCAGAGCCGGAAACACCAAAACCAGAGGTTAAACCAGAGC  
CGAAACACCAAAACCAGAGGTTAAACCAGAGCCGGAAACACCAAAACCA  
GAGGTTAAACCAGAGCCGGAAACACCAAAACCAGAGGTTAAACCAGAGCC  
GGAAACACCAAAACCAGAGGTTAAACCAGAGCCGGAAACACCAAAACCAG  
AGGTTAAACCAGAGCCGGAAACACCAAAACCAGAGGTTAAACCAGAGCCG  
GAAACACCAAAACCAGAGGTTAAACCAGAGCCGGAAACACCAAAACCAGA  
GGTTAAACCAGATAATAGCAAGCCACAAGCAGATGATAAGAAGCCATCAA  
CTCAAATAATTTAAGCAAGGACAAGCAATCTTCTAACCAAGCTTCAACA  
AACGAAAACAAGAAGCAAGGTCCAGCAACAATAAACCGAAGAAGTCATT  
GCCATCAACTGGATCTATTTCA
